# Supplementary material for: Barriers, Opportunities, and Challenges in Addressing Disparities in Diet‐Related Cardiovascular Disease in the United States
Source: PubMed Central journal article supplement (PMC7428614; doi:10.1161/jaha.119.014433), 2020-03-23
Supplement: JAH3-9-e014433-s001.pdf [file JAH3-9-e014433-s001.pdf]

# **Supplemental Material**

**Table S1. Ideal, Intermediate and Poor Levels of AHA's Life's Simple 7 Components.**

| <b>Component</b>                                   | <b>Ideal</b>                                                                                             | <b>Intermediate</b>                                                                                         | <b>Poor</b>               |
|----------------------------------------------------|----------------------------------------------------------------------------------------------------------|-------------------------------------------------------------------------------------------------------------|---------------------------|
| Smoking                                            | Never or former > 1 year                                                                                 | Former ≤1 year                                                                                              | Current                   |
| Healthy Diet Score<br><i>Primary Components*</i>   | 4-5 components                                                                                           | 2-3 components                                                                                              | 0-1 components            |
| <i>Fruits and vegetables</i>                       | ≥ 4.5 cups/day                                                                                           |                                                                                                             |                           |
| <i>Fish 3.5-oz servings (preferably oily fish)</i> | ≥2 servings/week                                                                                         |                                                                                                             |                           |
| <i>Sodium</i>                                      | 1500 mg/day                                                                                              |                                                                                                             |                           |
| <i>Sweets/sugar-sweetened Beverages</i>            | ≤450 kcal (36 oz.)/week                                                                                  |                                                                                                             |                           |
| <i>Whole grains, 1-oz-equivalent servings</i>      | ≥3 servings/day                                                                                          |                                                                                                             |                           |
| Physical Activity                                  | ≥150 min/week moderate intensity or ≥75 min/week vigorous intensity or ≥150 min/week moderate + vigorous | 1–149 min/week moderate intensity or 1–74 min/week vigorous intensity or 1–149 min/week moderate + vigorous | None                      |
| Body Mass Index                                    | < 25 kg/m <sup>2</sup>                                                                                   | 25-29.9 kg/m <sup>2</sup>                                                                                   | ≥30 kg/m <sup>2</sup>     |
| Blood Pressure                                     | <120/<80 mm Hg untreated                                                                                 | SBP 120-139 or DBP 80-89 mmHg or treated to ideal level                                                     | SBP ≥140 or DBP ≥90 mmHg  |
| Total Cholesterol                                  | <5.18 mmol/L (<200 mg/dL) untreated                                                                      | 5.18-6.19 mmol/L (200-239 mg/dL) or treated to ideal level                                                  | ≥6.22 mmol/L (≥240 mg/dL) |
| Fasting Glucose                                    | <5.55 mmol/L (<100 mg/dL) untreated                                                                      | 5.55-6.94 mmol/L (100-125 mg/dL) or treated to ideal level                                                  | ≥6.99 mmol/L (≥126 mg/dL) |

\*Scaled for 2000 kcal/day; DBP, diastolic blood pressure; SBP, systolic blood pressure.

Adapted from<sup>11</sup>

**Figure S1. Mean Dietary Intakes for Primary Components of the American Heart Association's Healthy Diet Score by Race/Ethnicity and Age Group: NHANES 2015-2016.**

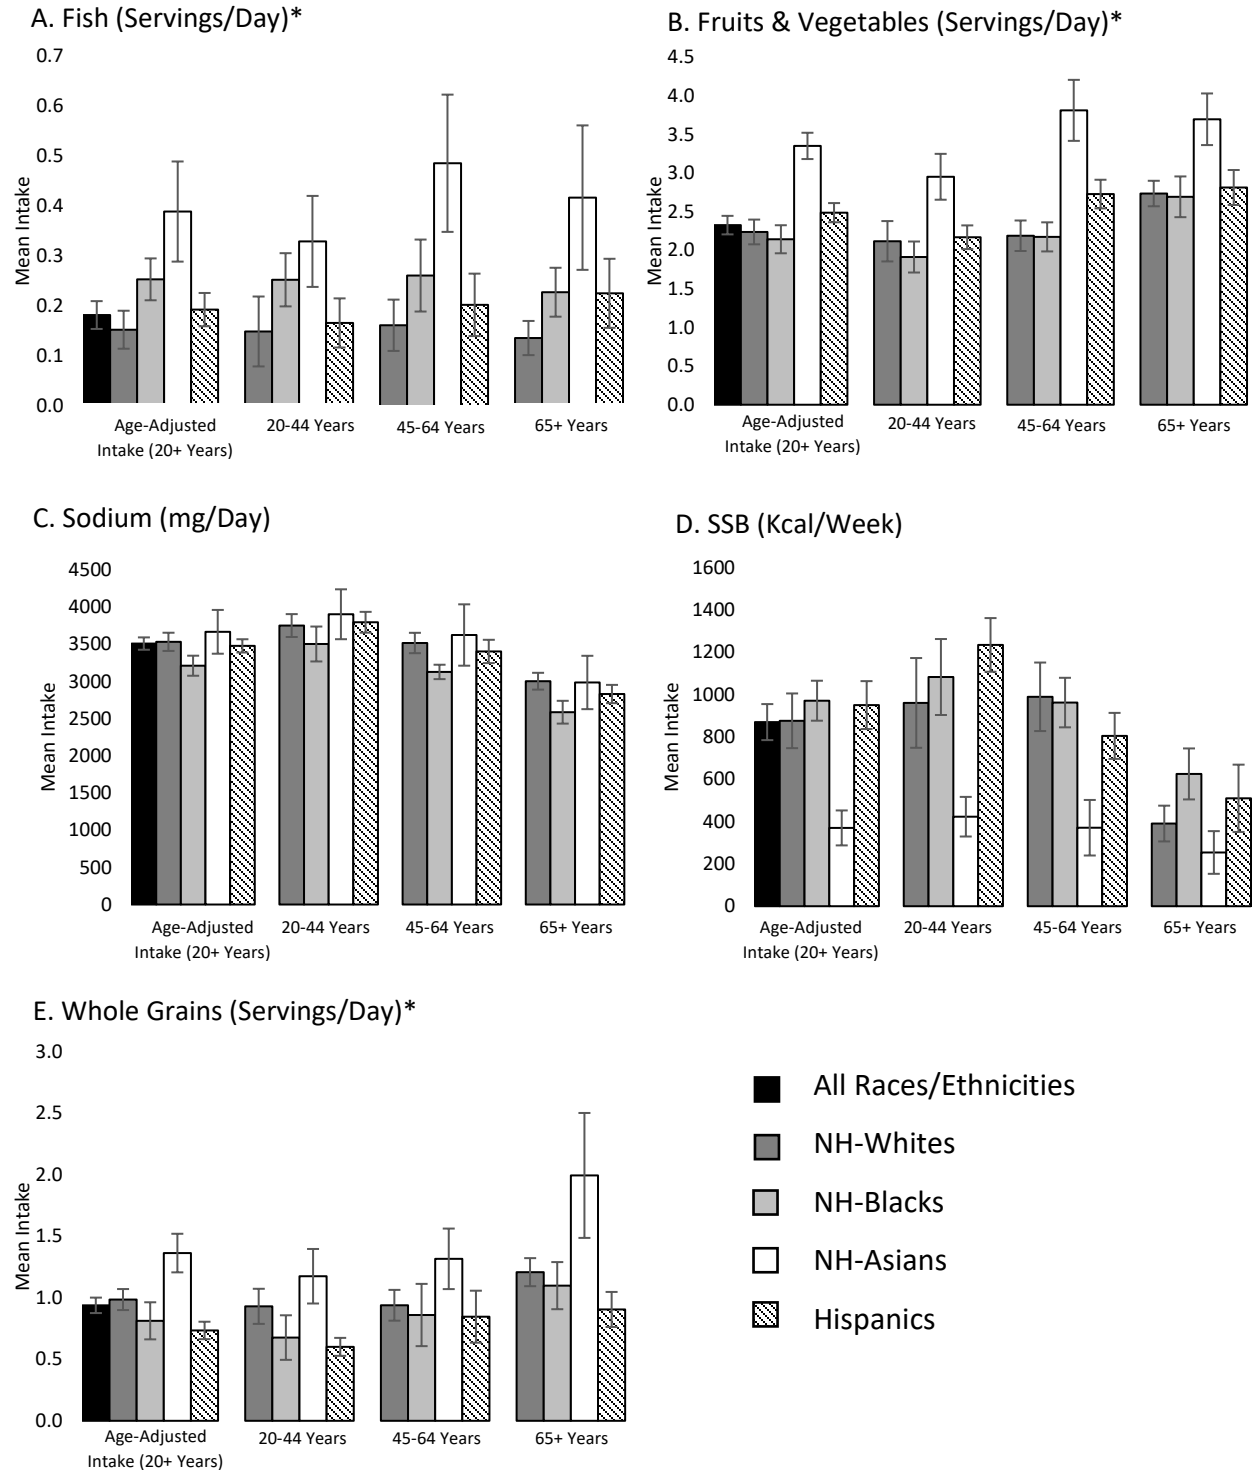

\*Intakes standardized to a 2,000 kcal/day diet; Error bars represent 95% Confidence Intervals

**Figure S2. Mean Dietary Intakes for Primary Components of the American Heart Association's Healthy Diet Score by Income to Poverty Ratio (IPR) and Age Group: NHANES 2015-2016.**

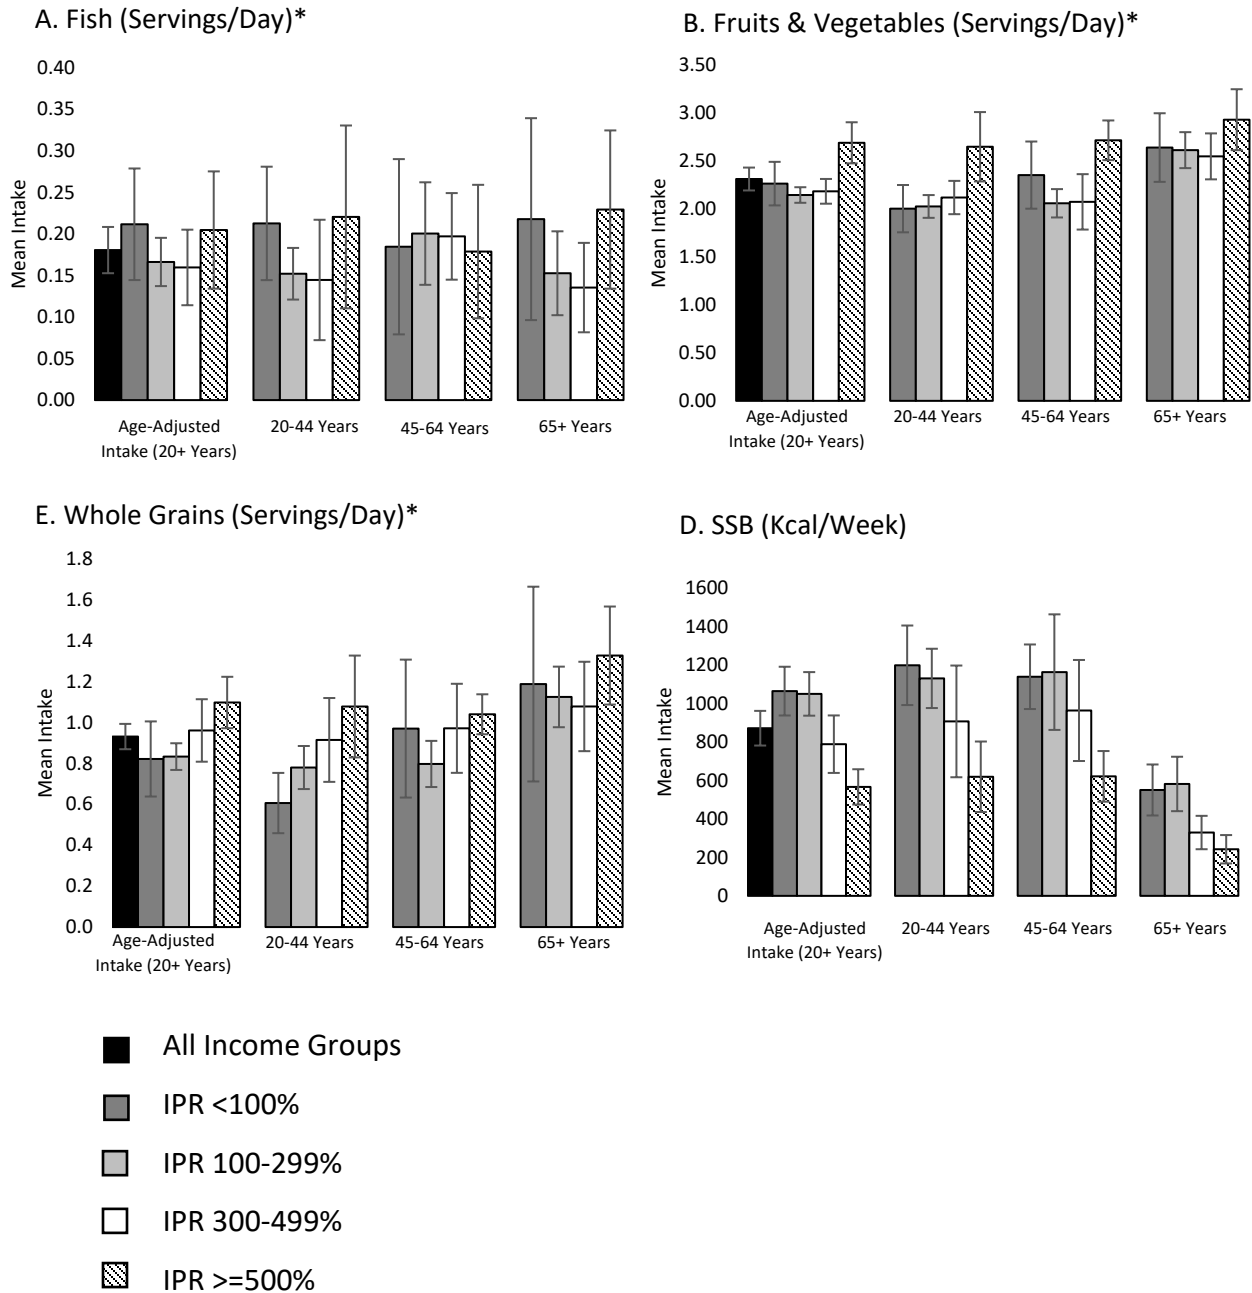

\*Intakes standardized to a 2,000 kcal/day diet; Error bars represent 95% Confidence Intervals

**Figure S3. Mean Dietary Intakes for Primary Components of the American Heart Association's Healthy Diet Score by Educational Attainment and Age Group: NHANES 2015-2016.**

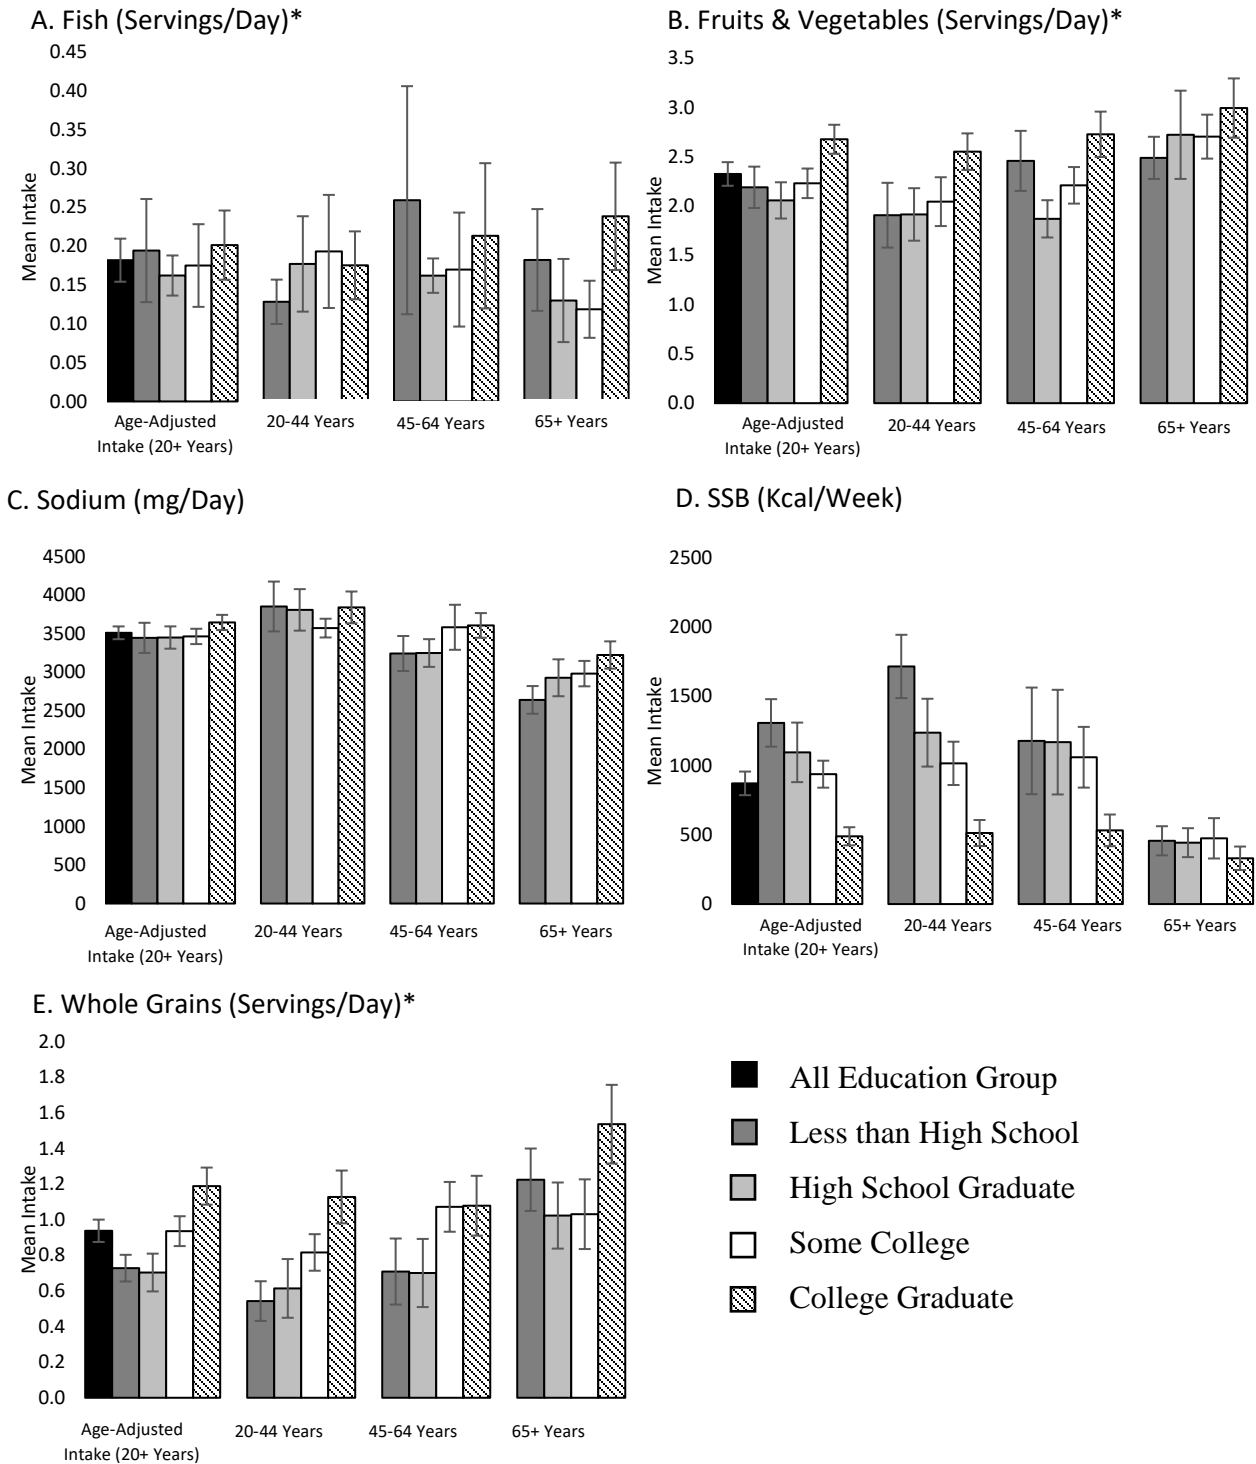

\*Intakes standardized to a 2,000 kcal/day diet; Error bars represent 95% Confidence Intervals

**Figure S4: Mean Dietary Intakes for Primary Components of the American Heart Association's Healthy Diet Score by Health Insurance Type and Age Group: NHANES 2015-2016.**

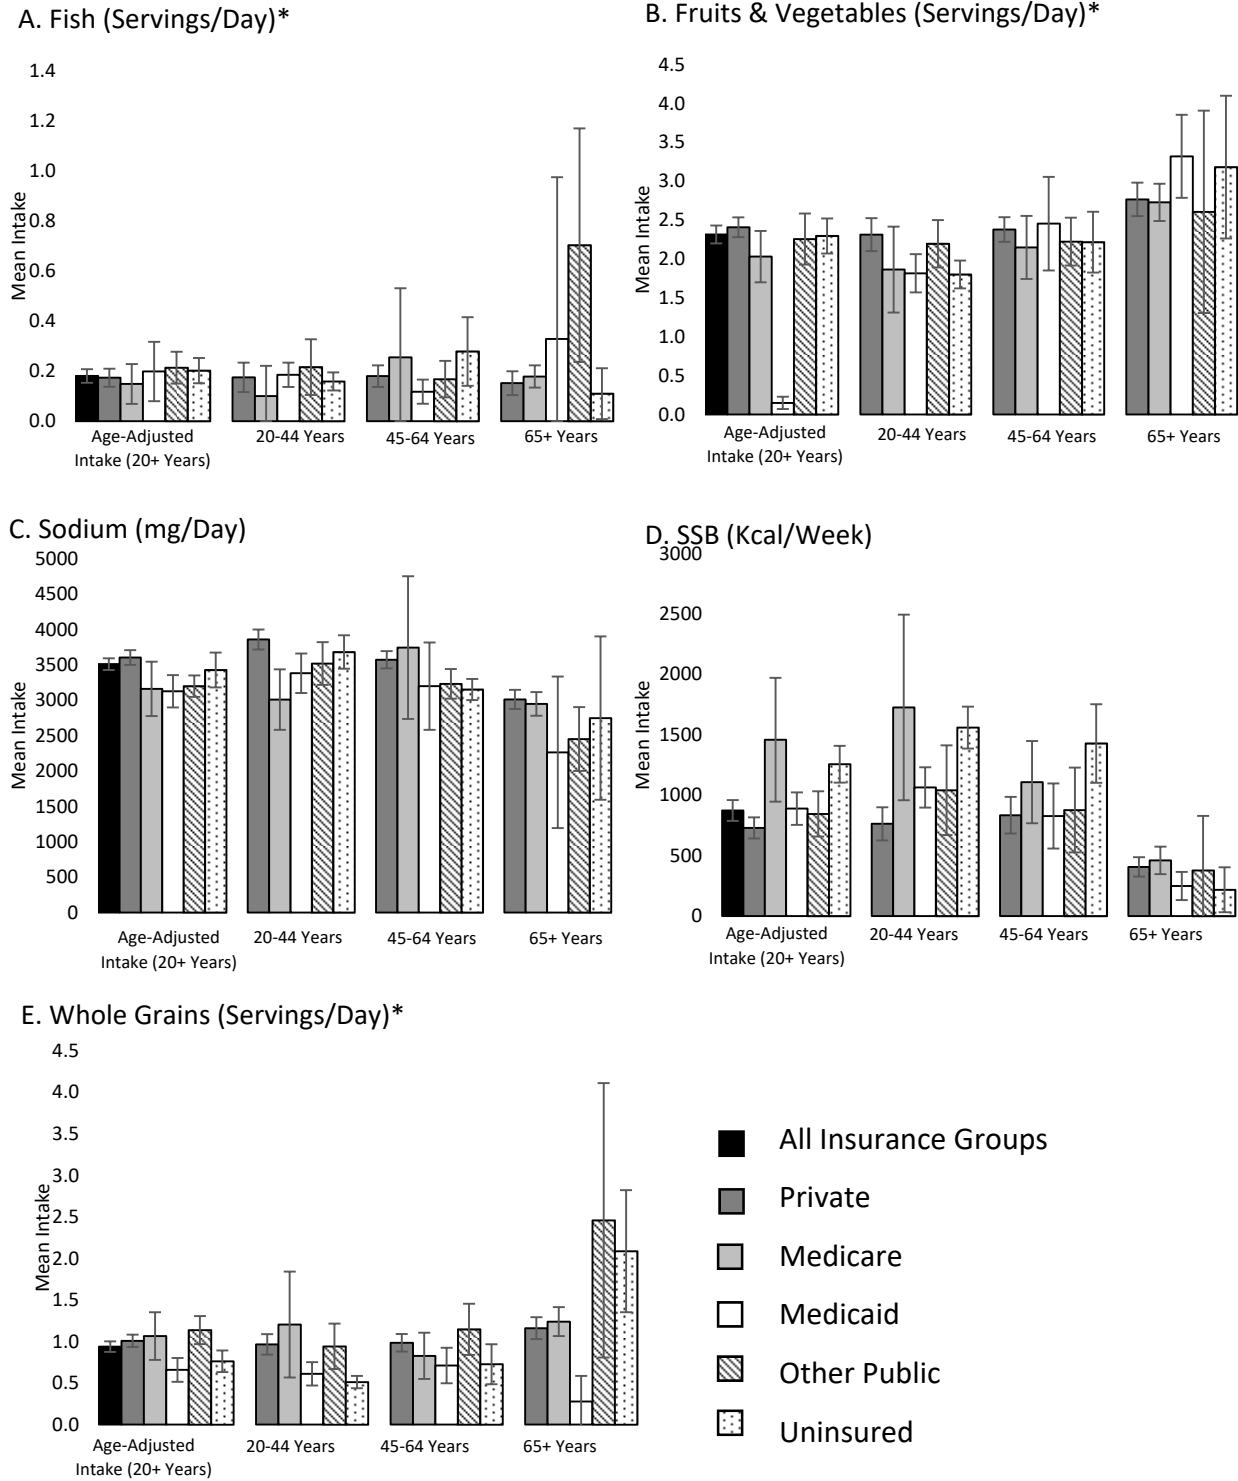

\*Intakes standardized to a 2,000 kcal/day diet; Error bars represent 95% Confidence Intervals
